# Supplementary material
Source: PubMed Central journal article supplement (PMC1459323)
Supplement: plntphys_pp.105.073841_1.pdf [file plntphys_pp.105.073841_1.pdf]

# A

```
At Hsp15.7 : MADRGIFLYPFR-----RFQEWRSSTALIDWMEEN (30)...(108) VENGVLTVVVPKDTSSKSSKVRNVNITSKL* : 137
Bg Hsp16.0 : MGES-IFGHPPRRFLWG-PP-IFREWSGSTALMDWFESP (36)...(112) VESGVLTIIVPKDTSPKSSKVRNINVASRL* : 141
Bp Hsp15.6 : MADG-VFCYPPRRFFLT-PS-IFREWSGSTALMDWLESP (36)...(112) VENGVLTIIVPKDATQKSSKVRNINISSKL* : 141
Cs Hsp14.6 : -----MS-PP-VFREWSGSTALMDWLESP (22)...(101) VDNGLTVIVPKDANKKSSVRNINISSKL* : 130
Gm Hsp16.2 : MAGT-IFGYPPRHFIWGHPP-IFKEWSGSTALLDWLESP (37)...(115) VENGVLTIIVPKDATPKTFKVRNINISRL* : 144
In Hsp16.1 : --MAAFFCDPPRRFLWSPTF-YHRAPPGSAAALDWIESP (36)...(116) VDNGLTVIVPKDTSPKQSKIRNINISSKL* : 145
Le Hsp16.1 : ---MALFCDPPRRFLLSPT--IHRSPGSPALLDWIESP (34)...(116) CENGVLTIIVPKDATPKTSKVININISSKL* : 145
Lj Hsp15.9 : MAES-IFGYPPGRFLWGHPP-IYREWSGSTPLLDWLESP (37)...(115) VENGVLTVIVPKKAAAPKSPKVRNVNITSKL* : 144
Ls Hsp15.6 : ---MALLCDPPRRFFFN-PP-IYRTGSAVAGLMDWFETP (34)...(112) VENGVLTVVLPKDLSPKASKVRNINIVSSKL* : 141
Mt Hsp16.0 : MAET-ILGYPPKRFLLDHTP-IFRGYSGSTALLDWIESP (37)...(113) VENGVLTVIVPKDASPESHKVRNINISSKL* : 142
Os Hsp16.0 : MADLFFGG-PPRRILYGRFPDPPDASASATAAMDWVETP (38)...(117) VDNGLTVIVPKKAPAPAPAPRTPIAVSSKL* : 146
Pv Hsp16.2 : MADT-IFGYLRRFFWNHPP-VFREWSGSTALLDWLESP (37)...(115) VENGVLTIILPKDTTPKSPKVRNINISRL* : 144
Qr Hsp16.1 : MADA-FFGYPPRRFFLS-PT-IFREWSGSTALMDWLESP (36)...(113) VENGVLTIIVPKDTTQKSSKVRNINISSKL* : 142
Ta Hsp15.1 : MADLFFGGSPPRRLLYARPF-----ASATAAMDWVETP (33)...(109) VDNGLTVIVPKKAPAPAPAPRTPIAVSSKL* : 138
Vv_Hsp15.8 : MSES-IRCFPPRRIFWG-AP-VERDLSGSTAPMDWLESP (36)...(113) VENGVLTIIVPKDTSPKASKVRNINISSKL* : 142
```

# B

```
RLxxxxxHF
At Acd31.2 : MEHESITARRRLAAFAAFPA-----TSYDSASTA (30)...(256) VSWPLPSNVNKDNVSAEFMDGILRIVIPKL*----- : 285
Amaj Acd30.7 : --MESGVVRRRTNIAAHLAS--CEDISAT--AT (28)...(237) IVWPIPTNADKEKISAEIQDGLLRITVPKLSGLRWLRKAHM* : 277
Gm Acd28.7 : --MESSEVKRRRIHMAAHFAP--NDDIST--T (26)...(232) VVWPLPAGVNKDRISAEFLDGFLLQIIVPKV*----- : 261
Mt Acd28.6 : --MENEVFKRRLDTAAHFAS--NEDISS--T (26)...(230) VCWPLPHGVNKDNVSAEFLDGFLLQI*----- : 254
Gr Acd28.3 : --MESITARRRISNIAFFPC--DDTLVSV-- (26)...(232) VVWPLPANVNRDSVSAEFLDGFLLRIVIPKL*----- : 254
Vv Acd28.6 : --MEKQARRRINLIGAHFAP--TDDLSAS-- (26)...(230) VAWTLPEFNANKDRVSAQFVDGFLQITIPKL*----- : 259
Le Acd26.5 : --MESQIVRRRVNMTAHLTA--HDDISASA--T (28)...(209) VFWPLPSNANKNRVSAEFVDGLLQITIPKL*----- : 238
Mc Acd30.7 : --MESQAARRRITTSGHFGTGIVTEDVTAAN--P (31)...(247) VVWPLPAGANKDAVYAEFVEGLHITIPKL*----- : 276
Ds N-EST : MDLESITARRRLAAFAAFPA-----TTYDPAS-- (28)..... :
Ah N-EST : --MESLIVRRRVNLIASHFAS--TDDISA--T (26)..... :
Amar N-EST : --MESQVRRRVNVIAAHFAS--REDISAT--AT (28)..... :
Bm N-EST : --MESVVRRRMNMIAAHFAG--CDDNLSP--T (27)..... :
Bv N-EST : --MESQVVKRRINTISGHLAARIVTEDVNAPN--T (31)..... :
Hp N-EST : --MASEIARRRVEMIGAHFSA--VDHISATAVAP (30)..... :
Ls N-EST : --METETAIRRVEMIAAHFSA--ADNISSTGVAT (30)..... :
PtXPt N-EST : --MDSBAVRRRMNMIVAHFAPT--ADDISSP--A (29)..... :
Br C-EST : ----- : VSWPLPSNVNKDNVAAEFMDGILRIVIPKI*----- :
Mp_C-EST : ----- : VVWPLPANVNRDSVSAEFLDGFLLRIVIPKL*----- :
```
