# Supplementary material
Source: PubMed Central journal article supplement (PMC1459323)
Supplement: plntphys_pp.105.073841_2.pdf [file plntphys_pp.105.073841_2.pdf]

## Suppl. Table I: Primers used for gene cloning, subcloning, and RT-PCR

Primers are given in 5'→3' orientation. The restriction sites and introduced point mutations are underlined.

| Gene/construct                   | Analysis                               | ORF modification                      | Forward/reverse primer                                                                                            |
|----------------------------------|----------------------------------------|---------------------------------------|-------------------------------------------------------------------------------------------------------------------|
| <b>Gene (sub-)cloning:</b>       |                                        |                                       |                                                                                                                   |
| AtHsp15.7 in pGEMT               | gene cloning                           | full-length (aa 1 to 137)             | for.: <u>CGGTCTAGAATGGCAGACAGAGGAATATTCTTG</u><br>rev.: AATCCCGGGTCAAAGCTTGCTAGTAAT                               |
| EYFP:AtHsp15.7 in pCAT-Nfus      | PTS1 analysis                          | full-length (aa 1 to 137)             | for.: ACATAAGAT <u>TGCCGCCGCTATGGCAGACAGAGGAATATTC</u><br>rev.: CCT <u>CTAGATCAAAGCTTGCTAGTAAT</u>                |
| EYFP:AtHsp15.7ΔPTS1 in pCAT-Nfus | PTS1 analysis                          | PTS1 deletion (aa 1 to 123)           | for.: ACATAAGAT <u>TGCCGCCGCTATGGCAGACAGAGGAATATTC</u><br>rev.: ATAT <u>CTAGATCACGATGAAGTGTCCCTTAGG</u>           |
| AtHsp15.7:EYFP in pCAT-Cfus      | mitochondrial targeting analysis       | PTS1 deletion (aa 1 to 123)           | for.: GATCCATGGCAGACAGAGGAATATT<br>rev.: ATACCATGGATGAAGTGTCCCTAGGAAC                                             |
| AtHsp15.7ΔPTS1 in pYES2.1        | yeast complementation                  | PTS1 deletion (aa 1 to 134)           | for.: GAATATGGCAGACAGAGGAAT<br>rev.: GTATCAAGTAATATTAACATTCCTAAC                                                  |
| AtAcd31.2 in pGEMT               | gene cloning                           | full-length (aa 1 to 285)             | for.: ACTGCGGCCGCTATGGAGCATGAATCTATCAC<br>rev.: TCAAAGCTTTGGAATTACTATTCTCAG                                       |
| AtAcd31.2:EYFP in pCAT-Cfus      | PTS2 analysis                          | full-length (aa 1 to 285)             | for.: CACTAACCATGGAGCATGAATCTATCAC<br>rev.: TGCTCACCATGGAAAGCTTTGGAATTACTATTC                                     |
| AtAcd31.2ΔPTS2:EYFP in pCAT-Cfus | PTS2 analysis                          | PTS2 deletion (aa 30 to 285)          | for.: CACTAACCATGGAGCATCTCGTCCCCCTTG<br>rev.: TGCTCACCATGGAAAGCTTTGGAATTACTATTC                                   |
| AtAcd31.2:EYFP(H→D) in pCAT-Cfus | PTS2 analysis                          | PTS2 mutation (aa 1 to 285, H18→D)    | for.: AGGCTCGCTGCCTTCGCCGCGGACTTCCCAGCAACAGTTACGATTCCG<br>rev.: CGGAATCGTAACCTGGTTGCCGGAAGTCCGCGGCAAGGCAGCGAGCCCT |
| EYFP:AtAcd31.2 in pCAT-Nfus      | PTS1 analysis                          | full-length (aa 1 to 285)             | for.: ACTGCGGCCGCTATGGAGCATGAATCTATCAC<br>rev.: TCAAAGCTTTGGAATTACTATTCTCAG                                       |
| EYFP:AtAcd31.2ΔPTS1 in pCAT-Nfus | PTS1 analysis                          | PTS1 deletion (aa 1 to 282)           | for.: ACTGCGGCCGCTATGGAGCATGAATCTATCAC<br>rev.: GATCAAATTACTATTCTCAGAATCC                                         |
| EYFP-AtAcd31.2(K→E) in pCAT-Nfus | PTS1 analysis                          | PTS1 mutation (aa 1 to 285, K284→E)   | for.: GGGATTCTGAGAATAGTAATTCCAGAGCTCTGAGCGGCCGCTCTAGAG<br>rev.: CTCTAGAGCGGCCGCTCAGAGCTCTGGAATTACTATTCTCAGAATCC   |
| AtAcd31.2ΔPTS1 in pYES2.1        | yeast complementation, PTS1 deletion   | PTS1 deletion (aa 1 to 282)           | for.: AGAGATGGAGCATGAATCTATC<br>rev.: GATCAAATTACTATTCTCAGAATCC                                                   |
| AtAcd31.2ΔPTS1+2 in pYES2.1      | yeast complementation, PTS1/2 deletion | PTS1 and PTS2 deletion (aa 30 to 282) | for.: CACTAACCATGGAGCATCTCGTCCCCCTTG<br>rev.: GATCAAATTACTATTCTCAGAATCC                                           |
| <b>RT-PCR:</b>                   |                                        |                                       |                                                                                                                   |
| AtHsp15.7                        |                                        |                                       | for.: CGGTCTAGAATGGCAGACAGAGGAATATTCTTG<br>rev.: AATCCCGGGTCAAAGCTTGCTAGTAAT                                      |
| AtAcd31.2                        |                                        |                                       | for.: CACTAACCATGGAGCATGAATCTATCAC<br>rev.: GATCAAATTACTATTCTCAGAATCC                                             |
| AtpMDH                           |                                        |                                       | for.: CTCTGTAATCGGACGGGAAAAC<br>rev.: ACTTCTCTGCTCCTGTACGG                                                        |
| Ubiquitin                        |                                        |                                       | for.: GATCTTTGCCGAAAACAATTGGAGGATGGT<br>rev.: CGACTTGTATTAGAAAAGAGATAACAGG                                        |
