# Supplementary material
Source: PubMed Central journal article supplement (PMC1459323)
Supplement: plntphys_pp.105.073841_3.pdf [file plntphys_pp.105.073841_3.pdf]

## Suppl. Table II:

### Conservation of the Hsp20 domain in *Arabidopsis* sHsps and Acd proteins

For 16 sHsp and 25 Acd proteins (Scharf et al., 2001) the E value of the Hsp20 domain was determined (HMMER, hmmer.wustl.edu,) and the proteins listed according to sequence conservation of the Hsp20 domain. If the size of the predicted polypeptide was altered according to improved gene prediction, the new predicted molecular mass was calculated and the former acronym adapted. (e.g. for At1g52560 AtHsp26.5-P to AtHsp19.9- P). For the two peroxisomal sHsp identified in this study the acronyms AtHsp15.7-Px (formerly AtHsp15.7-CI) and AtAcd31.2-Px are suggested. Note that the previous protein classification into Hsps and Acd proteins introduced by Scharf et al. (2001) is not related to phylogenetic relationship or Hsp20 domain conservation (see also Suppl. Fig. 1). AtAcd44.3, AtAcd48.0, and AtAcd86.6 are annotated ARID/BRIGHT DNA-binding domain-containing proteins. Abbreviations: CI/II/III: cytosolic class I/II/III; M: mitochondrium; n.d.: E value <1 not detected; P: plastid; Px: peroxisome.

| Acronym             |                     | Gene locus       | Size         | Hsp20 domain   |                   |
|---------------------|---------------------|------------------|--------------|----------------|-------------------|
| new                 | former              |                  | (aa)         | E value        | location          |
| <b>E &lt; e-2</b>   |                     |                  |              |                |                   |
| AtHsp17.6-CII       | identical           | At5g12020        | 155          | 2.7e-52        | 48 to 153         |
| AtHsp17.4-CI        | identical           | At3g46230        | 156          | 2.4e-51        | 52 to 155         |
| AtHsp17.6C-CI       | identical           | At1g53540        | 157          | 4.4e-51        | 53 to 156         |
| AtHsp18.1-CI        | identical           | At5g59720        | 161          | 5.5e-51        | 55 to 158         |
| AtHsp17.7-CII       | identical           | At5g12030        | 156          | 7.7e-50        | 49 to 154         |
| AtHsp17.8-CI        | identical           | At1g07400        | 157          | 1.8e-49        | 51 to 151         |
| AtHsp17.6B-CI       | identical           | At2g29500        | 153          | 1.3e-48        | 49 to 152         |
| AtHsp17.6A-CI       | identical           | At1g59860        | 155          | 1.9e-48        | 49 to 154         |
| AtHsp25.3-P         | identical           | At4g27670        | 227          | 8.6e-46        | 130 to 227        |
| AtHsp22.0-ER        | identical           | At4g10250        | 195          | 1.1e-43        | 74 to 178         |
| AtHsp19.9-P         | AtHsp26.5-P         | At1g52560        | 232          | 3.1e-27        | 128 to 232        |
| <b>AtHsp15.7-Px</b> | <b>AtHsp15.7-CI</b> | <b>At5g37670</b> | <b>137</b>   | <b>3.2e-24</b> | <b>25 to 134</b>  |
| AtHsp17.4-CIII      | identical           | At1g54050        | 155          | 6.5e-23        | 45 to 153         |
| AtHsp23.6-M         | identical           | At4g25200        | 210          | 1.7e-21        | 110 to 210        |
| AtHsp23.5-M         | identical           | At5g51440        | 210          | 1.7e-19        | 112 to 210        |
| AtHsp15.4-CI        | identical           | At4g21870        | 134          | 1.3e-10        | 29 to 121         |
| <b>AtAcd31.2-Px</b> | <b>identical</b>    | <b>At1g06460</b> | <b>285</b>   | <b>5.8e-06</b> | <b>189 to 284</b> |
| AtAcd41.3           | identical           | At5g04890        | 366          | 7.3e-06        | 24 to 121         |
| AtAcd28.1           | identical           | At5g20970        | 249          | 8.8e-06        | 18 to 113         |
| AtAcd28.7           | identical           | At1g76770        | 244          | 0.00034        | 34 to 133         |
| AtHsp18.5-CI        | identical           | At2g19310        | 162          | 0.00036        | 63 to 158         |
| AtHsp14.7-P         | AtHsp14.2-P         | At5g47600        | 131          | 0.00036        | 33 to 125         |
| AtAcd25.1           | identical           | At2g27140        | 224          | 0.00091        | 21 to 114         |
| AtAcd54.2           | identical           | At3g10680        | 490          | 0.00094        | 31 to 124         |
| AtAcd25.4           | identical           | At4g16540        | 232          | 0.0021         | 149 to 185        |
| AtAcd27.7           | AtAcd26.0           | At2g03020        | 247          | 0.0084         | 182 to 208        |
| AtAcd22.3           | AtAcd21.4           | At1g54850        | 206          | 0.0088         | 103 to 124        |
| <b>E &gt; e-2</b>   |                     |                  |              |                |                   |
| AtAcd86.6           | AtAcd32.4           | At2g17410        | 786          | 0.011          | 701 to 786        |
| AtHsp21.7-CI        | identical           | At5g54660        | 192          | 0.014          | 90 to 191         |
| AtAcd28.9           | identical           | At5g47590        | 264          | 0.015          | 168 to 264        |
| AtAcd48.0           | AtAcd55.2           | At1g76510        | 434          | 0.02           | 351 to 434        |
| AtAcd16.6           | identical           | At1g54400        | 153          | 0.023          | 48 to 74          |
| AtAcd216.9          | identical           | At1g76780        | 1871         | 0.034          | 9 to 39           |
| AtAcd44.3           | identical           | At1g20910        | 398          | 0.042          | 315 to 398        |
| AtAcd22.1           | identical           | At3g22530        | 198          | 0.062          | 144 to 177        |
| AtAcd56.6           | AtAcd55.5           | At5g02480        | 508          | 0.13           | 384 to 501        |
| AtAcd81.4           | identical           | At4g16550        | 743          | 0.17           | 189 to 282        |
| AtAcd57.5           | AtAcd114.3          | At4g16560        | 532          | 0.17           | 35 to 128         |
| AtAcd39.4/30.4*     | AtAcd39.0           | At1g54840        | 349 and 268* | 0.95           | 244 to 347        |
| AtAcd51.9           | identical           | At1g20870        | 463          | n.d.           |                   |
| AtAcd15.5           | identical           | At1g76440        | 143          | n.d.           |                   |
| AtAcd55.8/39.8      | AtAcd55.8           | At2g37570        | 494 and 351  | n.d.           |                   |
| AtAcd55.3           | identical           | At3g12570        | 489          | n.d.           |                   |
| AtAcd16.9           | identical           | At4g14830        | 152          | n.d.           |                   |
